# Supplementary material
Source: PubMed Central journal article supplement (PMC3635041)
Supplement: NIHMS456772-supplement-Supp_Fig_S1.pdf [file NIHMS456772-supplement-Supp_Fig_S1.pdf]

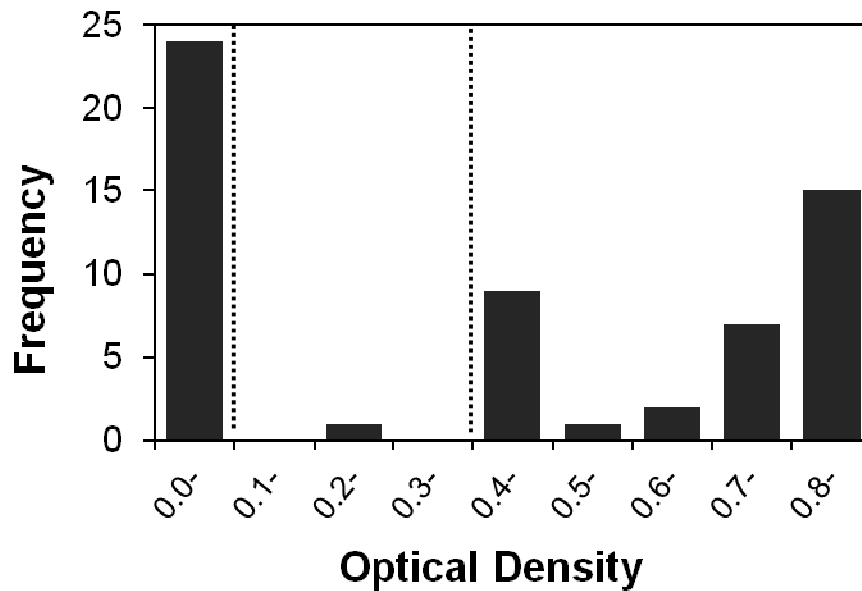

**Supplementary Figure 1.**

**Distributions of optical density values of individual CTL-K9.3 clone against HapMap B-LCLs assayed by ELISA.**

HapMap CEU B-LCLs were transduced with HLA-B\*07:02 cDNA and assayed for their minor H antigen status by interferon- $\gamma$  ELISA at a predetermined Responder: Stimulator ratio. Assays were performed at least in duplicate. Dotted lines indicate threshold for antigen-negative and positive subjects.
