# Supplementary material
Source: PubMed Central journal article supplement (PMC3635041)
Supplement: NIHMS456772-supplement-Supp_Table_S1.pdf [file NIHMS456772-supplement-Supp_Table_S1.pdf]

### HLA Genotypes of CHB Individuals

| ID#     | HLA-A |       | HLA-B |       | HLA-C |       | HLA-DRB1 |       |
|---------|-------|-------|-------|-------|-------|-------|----------|-------|
|         |       |       |       |       |       |       |          |       |
| GM06985 | 03:01 | 02:01 | 07:02 | 57:01 | 06:02 | 07:02 | 15:01    | -     |
| GM06993 | 02:01 | 01:01 | 07:02 | 50:01 | 06:02 | 07:02 | 04:04    | 07:01 |
| GM06994 | 02:01 | 32:01 | 08:01 | 40:02 | 02:02 | 07:01 | 01:01    | 04:04 |
| GM07000 | 02:01 | 68:01 | 40:01 | 44:02 | 03:04 | 07:04 | 03:01    | 11:01 |
| GM07022 | 01:01 | 02:01 | 07:02 | 08:01 | 07:01 | 07:02 | 04:04    | 07:01 |
| GM07034 | 02:01 | 24:03 | 18:01 | 44:02 | 05:01 | 07:01 | 04:01    | 07:01 |
| GM07055 | 02:01 | 68:01 | 07:02 | -     | 07:02 | -     | 14:01    | 15:01 |
| GM07056 | 01:01 | 02:01 | 08:01 | 57:01 | 06:02 | 07:01 | 03:01    | 07:01 |
| GM07345 | 01:01 | 02:01 | 44:02 | 57:01 | 05:01 | 06:02 | 07:01    | 15:01 |
| GM07357 | 01:01 | 24:02 | 08:01 | 39:06 | 07:01 | 07:02 | 03:01    | 04:04 |
| GM11829 | 02:01 | -     | 15:01 | 44:02 | 03:04 | 05:01 | 04:01    | -     |
| GM11830 | 02:01 | -     | 14:01 | 14:02 | 08:02 | -     | 07:01    | 13:03 |
| GM11831 | 01:01 | 03:01 | 07:02 | 08:01 | 07:01 | 07:02 | 03:01    | 15:01 |
| GM11832 | 02:01 | 32:01 | 27:03 | 40:02 | 02:02 | 07:04 | 13:01    | 15:01 |
| GM11839 | 02:01 | 25:01 | 07:02 | 44:02 | 05:01 | 07:02 | 04:01    | 15:01 |
| GM11840 | 02:01 | -     | 27:03 | 57:01 | 02:02 | 06:02 | 04:04    | 0701  |
| GM11881 | 03:01 | 26:01 | 07:02 | -     | 07:02 | -     | 15:01    | -     |
| GM11882 | 01:01 | 29:01 | 15:01 | 4403  | 06:02 | 16:01 | 04:01    | 15:01 |
| GM11992 | 01:01 | 02:01 | 08:01 | 35:01 | 04:01 | 07:01 | 01:01    | 03:01 |
| GM11993 | 26:01 | 29:01 | 44:02 | 44:03 | 05:01 | 16:01 | 01:01    | 15:01 |
| GM11994 | 01:01 | 11:01 | 07:02 | 51:01 | 07:02 | 15:02 | 04:02    | 04:04 |
| GM11995 | 01:01 | -     | 08:01 | 57:01 | 06:02 | 07:01 | 13:01    | 15:01 |
| GM12003 | 02:01 | -     | 08:01 | 13:02 | 06:02 | 07:01 | 04:01    | 15:01 |
| GM12004 | 02:01 | 24:02 | 07:02 | -     | 07:02 | -     | 01:01    | 15:01 |
| GM12005 | 02:01 | 29:01 | 27:02 | 27:03 | 01:02 | 07:02 | 15:01    | -     |
| GM12006 | 11:01 | 25:01 | 15:01 | 18:01 | 03:03 | 12:03 | 04:04    | 15:01 |
| GM12043 | 02:06 | 26:01 | 35:01 | 38:01 | 04:01 | 12:03 | 01:01    | 04:04 |
| GM12044 | 01:01 | 02:01 | 07:02 | -     | 07:02 | -     | 13:01    | 15:01 |
| GM12056 | 01:01 | 24:02 | 15:01 | 40:01 | 03:03 | 03:04 | 04:04    | 15:01 |
| GM12057 | 01:01 | 02:01 | 15:01 | 40:01 | 04:01 | 07:01 | 07:01    | 13:01 |
| GM12144 | 02:01 | 03:01 | 35:01 | 44:02 | 04:01 | 07:04 | 01:01    | 04:07 |
| GM12145 | 01:01 | 02:01 | 35:03 | 52:01 | 04:01 | 12:02 | 11:01    | 15:01 |
| GM12146 | 02:01 | 03:01 | 08:01 | 44:02 | 05:01 | 07:01 | 01:01    | 15:01 |
| GM12154 | 01:01 | 31:01 | 08:01 | 40:01 | 03:04 | 07:01 | 03:01    | 04:04 |
| GM12155 | 01:01 | 02:01 | 08:01 | 44:02 | 05:01 | 07:01 | 03:01    | 04:01 |
| GM12156 | 02:01 | 11:01 | 50:01 | 51:01 | 06:04 | 15:02 | 04:07    | 07:01 |
| GM12234 | 11:01 | 32:01 | 40:02 | 44:03 | 15:02 | 16:01 | 07:01    | 14:04 |
| GM12236 | 02:01 | -     | 07:02 | 44:02 | 05:01 | 07:02 | 04:03    | 12:01 |
| GM12239 | 25:01 | 68:01 | 15:01 | 18:01 | 03:03 | 12:03 | 01:01    | 04:01 |
| GM12248 | 23:01 | -     | 41:01 | 51:01 | 15:02 | 17:01 | 07:01    | 15:01 |
| GM12249 | 02:01 | 25:01 | 40:01 | 44:02 | 03:04 | 05:01 | 04:01    | 13:02 |
| GM12264 | 31:03 | 32:01 | 15:01 | 40:01 | 03:03 | 03:04 | 04:04    | -     |
| GM12716 | 02:01 | -     | 44:02 | 49:01 | 05:01 | 07:01 | 01:01    | 04:05 |
| GM12717 | 01:01 | 02:01 | 07:02 | 08:01 | 07:01 | 07:02 | 01:01    | 14:01 |
| GM12750 | 02:01 | 31:01 | 07:02 | 15:01 | 03:03 | 07:02 | 04:04    | 15:01 |
| GM12751 | 01:01 | 02:01 | 07:02 | 08:01 | 07:01 | 07:02 | 03:01    | 04:01 |
| GM12760 | 23:01 | 24:02 | 44:03 | 51:01 | 04:01 | 14:02 | 07:01    | -     |
| GM12761 | 01:01 | 24:02 | 07:02 | 08:01 | 07:01 | 07:02 | 03:01    | 15:01 |
| GM12762 | 02:01 | -     | 44:02 | 51:01 | 05:01 | 14:02 | 04:01    | 08:01 |
| GM12763 | 01:01 | 03:01 | 07:02 | 08:01 | 07:01 | 07:02 | 01:03    | 15:01 |
| GM12812 | 02:01 | -     | 44:02 | -     | 05:01 | -     | 04:01    | 13:01 |
| GM12813 | 24:02 | 29:01 | 44:03 | 57:01 | 06:02 | 16:01 | 07:01    | -     |
| GM12814 | 02:01 | 03:01 | 07:02 | 07:09 | 07:02 | -     | 01:03    | 15:01 |
| GM12815 | 01:01 | 24:02 | 08:01 | 55:01 | 07:01 | 07:02 | 04:07    | 13:01 |
| GM12872 | 01:01 | 03:01 | 08:01 | 14:02 | 07:01 | 08:02 | 03:01    | 04:01 |
| GM12873 | 03:01 | 24:02 | 07:02 | 39:06 | 07:02 | -     | 15:01    | -     |
| GM12874 | 02:01 | 24:02 | 35:01 | 51:01 | 04:01 | 14:02 | 08:01    | 16:01 |
| GM12875 | 24:02 | 25:01 | 18:01 | 37:01 | 06:02 | 12:03 | 08:01    | 15:01 |
| GM12891 | 01:01 | 24:02 | 07:02 | 08:01 | 07:01 | 07:02 | 03:01    | 15:01 |
| GM12892 | 02:01 | 11:01 | 15:01 | 56:01 | 01:02 | 04:01 | 01:01    | -     |

Typed by r-SSOP (LABType and/or MPH methods)

-: Not detected (homozygous)

Blank: Not typed yet
