# Supplementary material
Source: PubMed Central journal article supplement (PMC3635041)
Supplement: NIHMS456772-supplement-Supp_Table_S2.pdf [file NIHMS456772-supplement-Supp_Table_S2.pdf]

### HLA Genotypes of CHB Individuals

| ID#     | HLA-A |       | HLA-B |       | HLA-C |       | HLA-DRB1 |       |
|---------|-------|-------|-------|-------|-------|-------|----------|-------|
|         |       |       |       |       |       |       |          |       |
| GM18524 | 02:01 | 02:07 | 56:01 | 58:01 | 03:02 | 08:01 | 08:03    | 12:02 |
| GM18526 | 24:02 | 33:03 | 40:01 | 58:01 | 03:02 | 07:02 | 03:01    | 12:02 |
| GM18529 | 11:01 | 33:03 | 15:01 | 46:01 | 01:02 | 03:03 | 08:03    | 09:01 |
| GM18532 | 30:01 | 68:01 | 13:02 | 15:18 | 06:02 | 07:04 | 04:01    | 07:01 |
| GM18537 | 02:07 | 11:01 | 38:02 | 46:01 | 01:02 | 07:02 | 09:01    | 16:02 |
| GM18540 | 02:07 | 11:01 | 40:01 | 46:01 | 01:02 | 07:02 | 08:03    | 13:02 |
| GM18542 | 11:01 | 33:03 | 46:01 | 58:01 | 01:02 | 03:02 | 03:01    | 09:01 |
| GM18545 | 11:01 | 24:02 | 40:01 | -     | 04:01 | 07:02 | 04:03    | 04:05 |
| GM18547 | 02:03 | 68:01 | 15:02 | 38:01 | 08:01 | 12:03 | 04:01    | 13:01 |
| GM18550 | 02:07 | -     | 13:01 | 46:01 | 01:02 | 03:04 | 09:01    | 15:01 |
| GM18552 | 02:07 | 11:01 | 40:02 | 46:01 | 01:02 | 15:02 | 09:01    | 12:02 |
| GM18555 | 02:06 | 11:01 | 07:05 | 54:01 | 01:02 | 07:02 | 04:05    | 11:01 |
| GM18558 | 02:01 | 24:02 | 48:01 | 67:01 | 07:02 | 08:01 | 09:01    | 15:01 |
| GM18561 | 24:02 | 26:01 | 39:01 | 59:01 | 01:02 | 07:02 | 04:05    | 08:03 |
| GM18562 | 11:01 | 33:03 | 51:01 | 52:01 | 12:02 | 14:02 | 09:01    | 12:02 |
| GM18563 | 02:01 | 33:03 | 48:01 | 51:01 | 08:03 | 15:02 | 04:07    | 14:01 |
| GM18564 | 02:01 | 30:01 | 13:01 | 13:02 | 03:04 | 06:02 | 07:01    | 12:02 |
| GM18566 | 02:01 | 33:03 | 08:01 | 35:01 | 03:03 | 07:02 | 03:01    | 13:02 |
| GM18570 | 02:01 | 02:06 | 15:01 | 15:11 | 03:03 | -     | 04:04    | 11:01 |
| GM18571 | 03:02 | 24:02 | 40:01 | 51:01 | 07:02 | 15:02 | 04:05    | 08:01 |
| GM18572 | 24:02 | 31:08 | 15:01 | 54:01 | 01:02 | 03:03 | 14:01    | 14:05 |
| GM18573 | 02:07 | -     | 46:01 | 54:01 | 01:02 | 07:02 | 04:05    | 09:01 |
| GM18576 | 02:01 | 03:02 | 08:01 | 35:01 | 03:03 | 07:02 | 03:01    | 08:02 |
| GM18577 | 02:01 | -     | 15:01 | 40:01 | 01:02 | 15:02 | 08:03    | 14:05 |
| GM18579 | 11:01 | -     | 52:01 | 81:01 | 08:01 | 12:02 | 12:01    | 15:02 |
| GM18582 | 11:01 | 24:02 | 40:01 | 52:01 | 07:02 | 12:02 | 08:03    | 09:01 |
| GM18592 | 24:02 | 31:01 | 15:18 | 40:06 | 08:01 | -     | 08:03    | 15:01 |
| GM18593 | 01:01 | 24:02 | 37:01 | 40:01 | 04:01 | 06:02 | 04:03    | 10:01 |
| GM18594 | 02:01 | -     | 13:01 | 15:01 | 03:04 | 08:01 | 12:01    | 12:02 |
| GM18603 | 02:06 | 30:01 | 13:02 | 40:06 | 06:02 | 08:01 | 07:01    | 09:01 |
| GM18605 | 02:03 | 02:06 | 15:01 | 38:02 | 03:03 | 07:02 | 08:03    | 15:01 |
| GM18608 | 24:02 | 31:01 | 48:01 | 51:01 | 08:01 | 15:02 | 14:05    | 14:07 |
| GM18609 | 02:03 | 03:01 | 35:03 | 38:02 | 07:02 | 12:03 | 08:03    | 14:01 |
| GM18611 | 11:01 | -     | 46:01 | 51:01 | 07:02 | 14:02 | 11:01    | 16:02 |
| GM18612 | 01:01 | 02:06 | 40:06 | 57:01 | 06:02 | 08:01 | 06:02    | 08:01 |
| GM18620 | 02:01 | 32:01 | 40:01 | 48:01 | 04:01 | 07:02 | 12:01    | 12:02 |
| GM18621 | 11:01 | 24:02 | 15:01 | 15:18 | 01:02 | 08:01 | 09:01    | 12:01 |
| GM18622 | 03:01 | 24:02 | 35:03 | 51:01 | 12:03 | 14:02 | 07:01    | 09:01 |
| GM18623 | 24:02 | 30:01 | 13:02 | 40:01 | 03:04 | 06:02 | 04:10    | 07:01 |
| GM18624 | 30:01 | 32:01 | 13:02 | 52:01 | 06:02 | 12:02 | 07:01    | 15:02 |
| GM18632 | 11:01 | 33:03 | 46:01 | 58:01 | 01:02 | 03:02 | 03:01    | 09:01 |
| GM18633 | 11:01 | -     | 54:01 | -     | 01:02 | -     | 04:05    | 08:03 |
| GM18635 | 11:01 | -     | 40:06 | 51:01 | 08:01 | 14:02 | 09:01    | -     |
| GM18636 | 11:01 | 24:02 | 40:01 | 46:01 | 01:02 | 07:02 | 09:01    | 15:01 |
| GM18637 | 02:01 | 11:01 | 15:01 | 67:01 | 04:01 | 07:02 | 04:05    | 12:02 |

Typed by r-SSOP (LABType and/or MPH methods)

-: Not detected (homozygous)
