# Supplementary material
Source: PubMed Central journal article supplement (PMC3635041)
Supplement: NIHMS456772-supplement-Supp_Table_S3.pdf [file NIHMS456772-supplement-Supp_Table_S3.pdf]

### HLA Genotypes of JPT Individuals

| ID#     | HLA-A |       | HLA-B |       | HLA-C |       | HLA-DRB1 |       |
|---------|-------|-------|-------|-------|-------|-------|----------|-------|
|         |       |       |       |       |       |       |          |       |
| GM18940 | 24:02 | -     | 46:01 | 52:01 | 01:03 | 12:02 | 08:02    | 15:02 |
| GM18942 | 24:02 | 33:03 | 35:01 | 44:03 | 03:03 | 14:03 | 04:05    | 12:01 |
| GM18943 | 02:06 | 02:07 | 35:01 | 46:01 | 01:02 | 03:03 | 08:02    | 08:03 |
| GM18944 | 02:06 | 24:02 | 40:02 | 51:01 | 03:04 | 14:02 | 08:02    | 12:01 |
| GM18945 | 31:01 | 33:03 | 15:01 | 44:03 | 07:02 | 14:03 | 09:01    | 13:02 |
| GM18947 | 02:06 | 24:02 | 52:01 | -     | 12:01 | -     | 15:02    | -     |
| GM18948 | 26:01 | 30:01 | 07:02 | 13:02 | 06:02 | 07:02 | 01:01    | 07:01 |
| GM18949 | 24:02 | 26:03 | 07:02 | 40:02 | 03:04 | 07:02 | 01:01    | 09:01 |
| GM18951 | 24:02 | -     | 40:01 | 59:01 | 01:02 | 03:04 | 04:05    | 11:01 |
| GM18952 | 24:02 | 31:01 | 07:02 | 51:01 | 07:02 | 14:02 | 09:01    | 14:01 |
| GM18953 | 11:01 | 31:01 | 40:01 | 40:02 | 03:04 | -     | 04:05    | 08:02 |
| GM18956 | 02:01 | 26:01 | 15:01 | 40:02 | 03:03 | 03:04 | 09:01    | 15:02 |
| GM18959 | 11:01 | 24:02 | 52:01 | 67:01 | 07:02 | 12:02 | 15:01    | 15:02 |
| GM18960 | 24:02 | 26:03 | 40:06 | 54:01 | 01:02 | 08:01 |          |       |
| GM18961 | 11:01 | 24:02 | 51:01 | 54:01 | 01:02 | -     | 04:05    | 09:01 |
| GM18964 | 26:01 | 26:03 | 35:01 | 40:02 | 03:03 | 03:04 | 04:05    | 15:01 |
| GM18965 | 26:02 | 31:01 | 40:06 | 56:01 | 04:01 | 08:01 | 09:01    | -     |
| GM18966 | 02:06 | 02:07 | 15:01 | 35:01 | 03:03 | -     | 15:01    | -     |
| GM18967 | 24:02 | -     | 40:02 | 51:01 | 03:04 | 14:02 | 09:01    | 14:05 |
| GM18968 | 11:01 | 31:01 | 40:01 | 51:01 | 07:02 | 14:02 | 14:03    | 15:01 |
| GM18969 | 24:02 | 31:01 | 48:01 | 52:01 | 08:03 | 12:02 | 14:01    | 15:02 |
| GM18970 | 24:02 | 26:01 | 15:18 | 54:01 | 01:02 | 07:04 | 04:01    | 14:05 |
| GM18971 | 02:06 | 24:02 | 40:02 | -     | 03:04 | 07:02 | 09:01    | 14:01 |
| GM18972 | 24:02 | -     | 40:02 | 59:01 | 01:02 | 03:03 | 04:05    | 15:01 |
| GM18973 | 24:02 | 33:03 | 15:07 | 46:01 | 01:02 | 03:03 | 08:03    | 14:03 |
| GM18974 | 02:01 | 26:01 | 39:01 | 40:01 | 07:02 | -     | 0:901    | 15:01 |
| GM18975 | 02:01 | 02:06 | 07:02 | 15:01 | 04:01 | 07:02 | 01:01    | 04:06 |
| GM18976 | 33:03 | -     | 44:03 | -     | 14:03 | -     | 13:02    | -     |
| GM18978 | 03:01 | 31:01 | 40:02 | 44:02 | 05:01 | 14:02 | 04:03    | 13:01 |
| GM18980 | 11:02 | 31:01 | 13:01 | 40:01 | 03:03 | 03:04 | 08:03    | 12:02 |
| GM18981 | 02:01 | 31:01 | 51:01 | -     | 14:02 | -     | 08:02    | 15:01 |
| GM18987 | 02:07 | 26:02 | 40:06 | 46:01 | 01:02 | 08:01 | 08:03    | 12:01 |
| GM18990 | 24:02 | 33:03 | 40:02 | 44:03 | 03:03 | 14:03 | 09:01    | 13:02 |
| GM18991 | 02:01 | 24:02 | 40:02 | 52:01 | 12:02 | 15:02 | 04:03    | 15:02 |
| GM18992 | 24:02 | 33:03 | 44:03 | 52:01 | 12:02 | 14:03 | 13:02    | 15:02 |
| GM18994 | 24:02 | 31:01 | 07:02 | 40:02 | 03:04 | 07:02 | 01:01    | 08:02 |
| GM18995 | 24:02 | 33:03 | 15:07 | 44:03 | 03:03 | 14:03 | 11:01    | 13:02 |
| GM18997 | 24:02 | 26:03 | 15:01 | 39:01 | 03:03 | 07:02 | 04:06    | 09:01 |
| GM18998 | 02:06 | 24:02 | 52:01 | 54:01 | 01:02 | 12:02 | 15:01    | 15:02 |
| GM18999 | 24:04 | 33:03 | 40:06 | 46:01 | 01:02 | 08:01 | 09:01    | -     |
| GM19000 | 24:02 | -     | 54:01 | 67:01 | 01:02 | 07:02 | 01:01    | 04:05 |
| GM19003 | 02:06 | 11:01 | 39:01 | -     | 07:02 | -     | 08:03    | 13:02 |
| GM19005 | 02:01 | 33:03 | 58:01 | 67:01 | 03:02 | 07:02 | 13:02    | 15:01 |
| GM19007 | 02:07 | 26:03 | 35:01 | 46:01 | 01:02 | 03:03 | 08:03    | 09:01 |
| GM19012 | 24:02 | -     | 35:01 | -     | 03:03 | -     | 04:03    | -     |

Typed by r-SSOP (LABType and/or MPH methods)

:- Not detected (homozygous)

Blank: Not typed yet
